# Supplementary material for: Insights on the structure and stability of Licanantase: a trimeric acid-stable coiled-coil lipoprotein from Acidithiobacillus thiooxidans
Source: PeerJ journal article supplement (doi:10.7717/peerj.457), 2014-08-05
Supplement: Figure_S1.pdf [file Figure_S1.pdf]

## Supplementary Figures

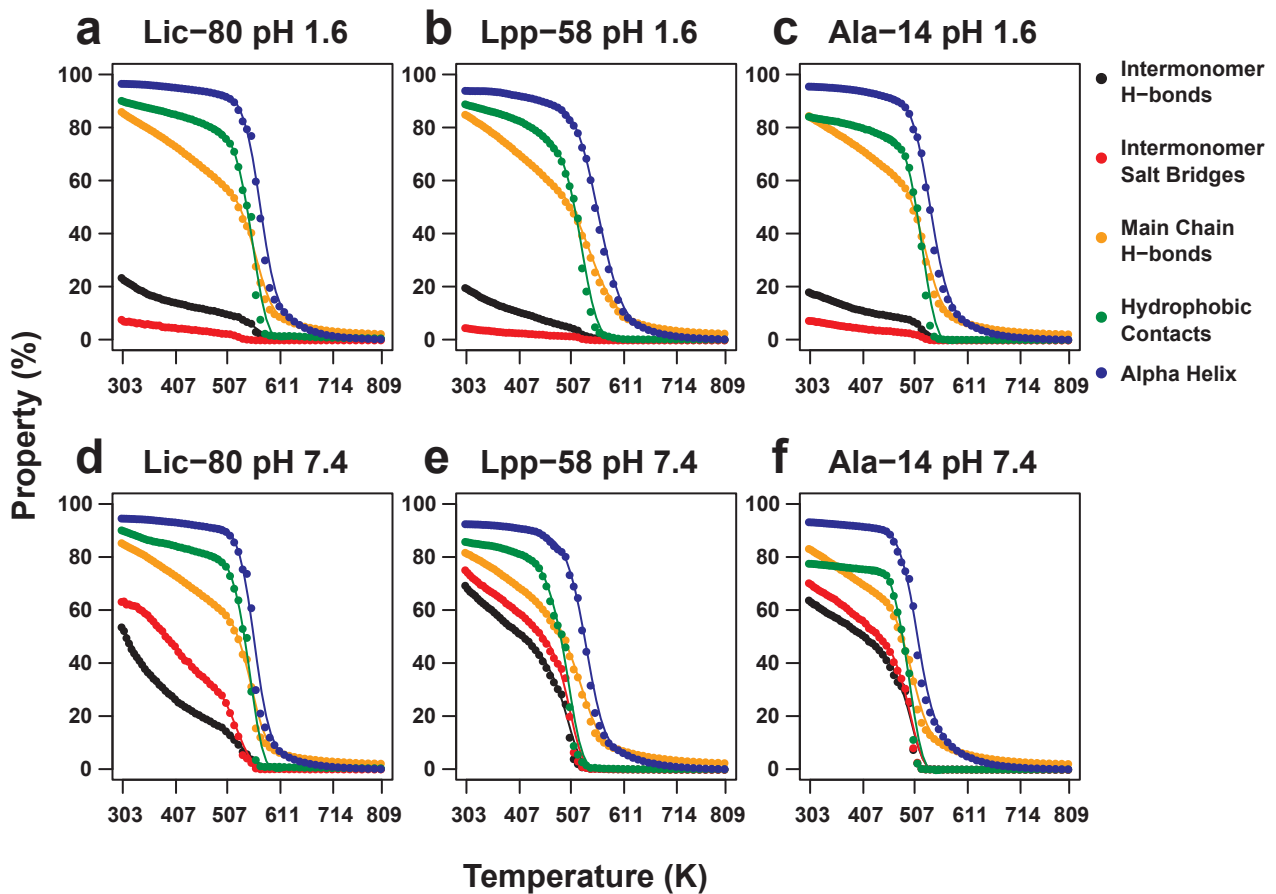

**Figure S1 - Mean percentage of structural properties versus temperature.**

Mean percentage of structural properties during last 50 ns in each REMD simulation, Lic-80 (a,d), Lpp-58 (b, e) and Ala-14 (c, f). Color coding: Intermonomer H-bonds (Black); Intermonomers Salt Bridges (Red); Main Chain H-bonds (Orange); Hydrophobic Contacts (Green) and Alpha Helix (Blue).
